# Supplementary material
Source: HighWire-hosted journal article supplement (doi:10.1101/rna.079825.123)

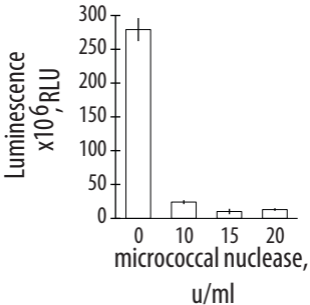

Supplement: Supplemental_Figure_S1.pdf [file Supplemental_Figure_S1.pdf]

A

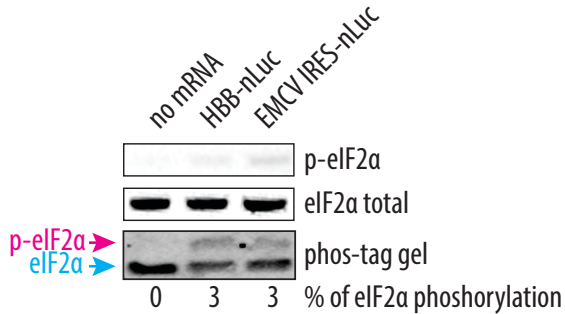

B

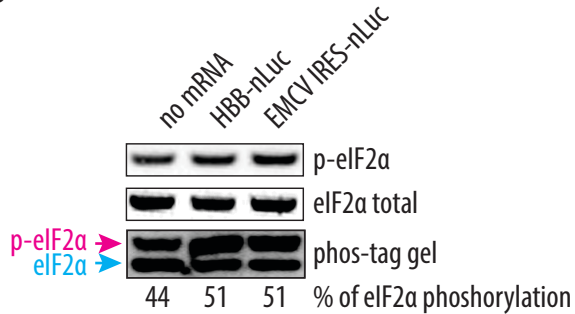

Supplement: Supplemental_Figure_S2.pdf [file Supplemental_Figure_S2.pdf]
